# Supplementary material
Source: publisher figshare collection journal article supplement (https://acs.figshare.com/ndownloader/files/3871201)
Supplement: Supplementary file 1 [file 3871201]

# Enhanced Thermoelectric Properties of Se Deficient Layered $\text{TiSe}_{2-x}$ : A Charge Density Wave Material

Ranu Bhatt <sup>a,\*</sup>, Shovit Bhattacharya <sup>a</sup>, Ranita Basu <sup>a</sup>, Sajid Ahmad <sup>a,b</sup>, A.K. Chauhan <sup>a</sup>, G.S. Okram <sup>c</sup>,  
Pramod Bhatt <sup>d</sup>, Mainak Roy <sup>e</sup>, M. Navaneethan <sup>f</sup>, Y. Hayakawa <sup>f</sup>, A.K. Debnath <sup>a</sup>, Ajay Singh <sup>a</sup>,  
D.K. Aswal <sup>a,\*</sup>, S.K. Gupta <sup>a</sup>

<sup>a</sup>Technical Physics Division, Bhabha Atomic Research Center, Mumbai-400 085, India

<sup>b</sup>Astrophysical Sciences Division, Bhabha Atomic Research Centre, Mumbai-400 085, India

<sup>c</sup>UGC-DAE Consortium for Scientific Research, University Campus, Khandwa Road, Indore-452 001, India

<sup>d</sup>Solid State Physics Division, Bhabha Atomic Research Centre, Trombay, Mumbai-400 085, India

<sup>e</sup>Chemistry Division, Bhabha Atomic Research Center, Mumbai-400 085, India

<sup>f</sup>National University Corporation, Research Institute of Electronics, Shizuoka University, 3-5-1 Johoku Naka-ku  
Hamamatsu-432 8011, Japan

\*Corresponding Authors: [rbhatt@barc.gov.in](mailto:rbhatt@barc.gov.in), [dkaswal@barc.gov.in](mailto:dkaswal@barc.gov.in)

## Supporting information:

### I. X-ray diffraction Rietveld refinement

The x-ray powder diffraction (XRD) measurements at room temperature have been used for structural characterization of the compounds. Figure S1 presents the Rietveld refined (using the FULLPROF program) room temperature XRD patterns of hot pressed and cold pressed compounds. It is evident from the fitted XRD patterns that all the compounds are in single crystalline phase. The crystal structures of the compounds are indexed with a hexagonal structure

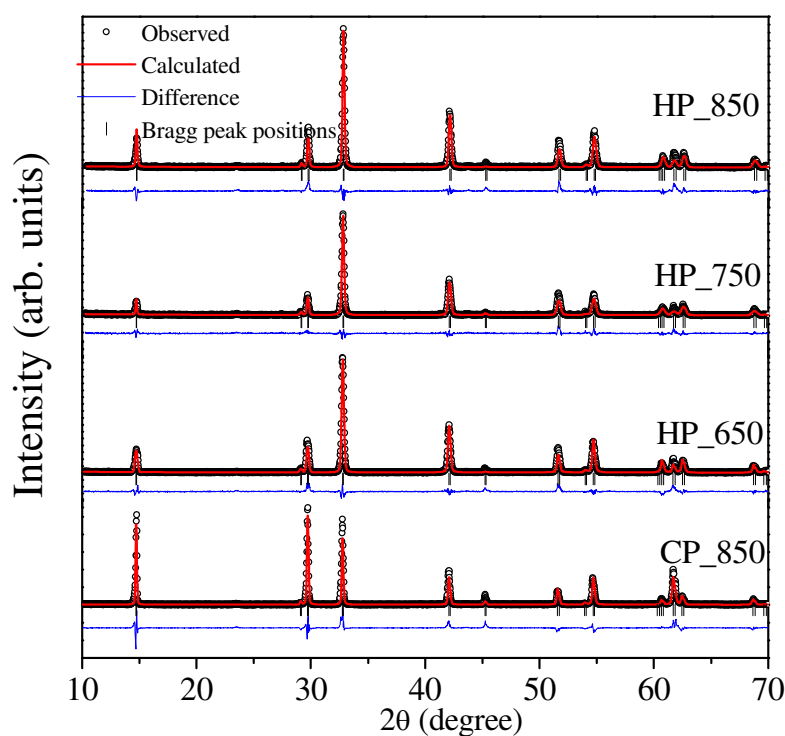

Fig. S1 Fitted XRD pattern for CP\_850, HP\_650, HP\_750 and HP\_850.

of the space group  $P\bar{3}m1$ . The important structural parameters, such as atomic coordinates, and lattice constants, derived from the Rietveld analysis of XRD, are shown in Table S1 for all the compounds.

**Table S1** Structural parameters of Reitveld refined XRD patterns of  $\text{TiSe}_{2-x}$  samples. ( $x$ ,  $y$  and  $z$  denote the fractional coordinates).

| Sample | Elements | $x$   | $y$   | $z$      | $a=b$    | $c$      | $c/a$    |
|--------|----------|-------|-------|----------|----------|----------|----------|
| CP_850 | Ti       | 0     | 0     | 0        | 3.541(2) | 6.009(4) | 1.697(2) |
|        | Se       | 0.333 | 0.666 | 0.257(2) |          |          |          |
| HP_650 | Ti       | 0     | 0     | 0        | 3.537(2) | 6.006(5) | 1.698(2) |
|        | Se       | 0.333 | 0.666 | 0.258(2) |          |          |          |
| HP_750 | Ti       | 0     | 0     | 0        | 3.534(6) | 6.003(1) | 1.699(3) |
|        | Se       | 0.333 | 0.666 | 0.251(3) |          |          |          |
| HP_850 | Ti       | 0     | 0     | 0        | 3.533(5) | 6.003(6) | 1.699(4) |
|        | Se       | 0.333 | 0.666 | 0.251(3) |          |          |          |

## II. X-ray photoelectron spectroscopy analysis

The x-ray photoelectron spectroscopy (XPS) data for all the  $\text{TiSe}_{2-x}$  samples has been recorded using Mg  $K\alpha$  (1253.6 eV) x-ray source. The energy calibration was made against the C 1s peak. Figure S2(a) and S2(b) shows the XPS spectra for all the samples corresponding to Ti and Se.

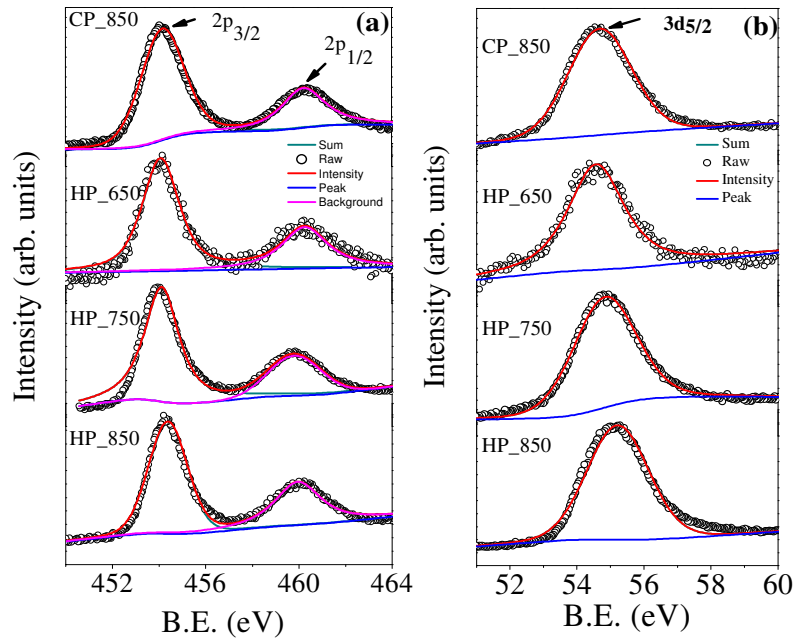

Fig. S2 Fitted XPS spectrum of samples (a) CP\_850 and (b) HP\_850.

The observed peaks in Ti at binding energy (BE) of 455.8 eV and 461.7 eV corresponds to the Ti  $2p_{3/2}$  and  $2p_{1/2}$ . Observed slight shift of 1.8 eV towards higher binding energy side with respect to pure Ti (454 eV for  $2p_{3/2}$ ) is due to the Ti-Se bond formation. The analyses of Ti and Se XPS spectra indicate that the BE position of Ti  $2p_{3/2}$  peak in CP\_850 and HP\_850 samples are at 455.7 and 455.3 eV, respectively. This shift in BE of Ti from 455.7 eV to 455.3 eV is attributed to the increased Se deficiency in the sample. The XPS spectra corresponding to Se  $3d_{5/2}$  exhibits peak at BE of 54.8 eV which correspond to the selenide. In case of Ti or Se oxide formation the BE energy should shift to 458.8 eV ( $TiO_2$ ) with respect to Ti and between 58.9 eV to 59.8 eV (SeO) with respect to Se. In present study, the observed BE of Ti and Se does not give any signature of the oxide formation.
